# Supplementary material for: Identifying Palliative Care Needs in Children with Acute Lymphoblastic Leukemia: Validation of the Chinese Pediatric Palliative Screening Scale (C-PaPaS)
Source: Research Square preprint supplement (doi:10.21203/rs.3.rs-7808438/v1), 2025-11-26
Supplement: Supplementary file 1 [file 4c0e9e6b5fc5b716505c6fdb.docx]

**Supplementary File 2**

**The Chinese version of the pediatric palliative care screening scale (C-PaPaS)**

(English Version)

| Domain and item numbers | Item | Characteristic | Score |
| --- | --- | --- | --- |
| **Domain1** | **Disease progression and impact on child's daily activities** | | |
| 1.1.1 | Referring to the past 3 months, compared with child's own baseline condition, the disease progression is... | …stable | 0 □ |
| …stable, but slowly deteriorating | 1 □ |
| …unstable and slowly deteriorating | 2 □ |
| …unstable and severely/rapidly deteriorating (please skip 1.1.2) | 4 □ |
| 1.1.2 | Referring to the past 3 months, compared with child's own baseline condition, the impact of the disease on the child's daily activities is...... | No impact | 0 □ |
| Daily activities are affected/limited | 1 □ |
| Daily activities are severely affected/limited | 2 □ |
| 1.2 | In the past 6 months, unplanned hospital admissions increased by more than 50% compared to previous periods | No | 0 □ |
| Yes | 3 □ |
| **Domain 2** | **Expected outcome of disease-modifying treatment and treatment-related burden** | | |
| 2.1 | Disease-directed treatment  (This does not include treatment for disease-related complications such as pain, dyspnea, or fatigue)) | …is curative | 0 □ |
| …can control the disease, prolong life, and improve quality of life | 1 □ |
| …cannot cure or control the disease, but has a positive impact on quality of life | 2 □ |
| …cannot control the disease and has no impact on improving quality of life | 4 □ |
| 2.2 | Treatment Burden  (Includes burden from both disease-directed treatment and symptom-related treatment) | No/Minimal burden or no treatment plan | 0 □ |
| Low burden | 1 □ |
| Moderate burden | 2 □ |
| High burden | 4 □ |
| **Domain 3** | **Symptoms and problems encountered during treatment** | | |
| 3.1.1 | Disease-related symptoms intensity in the past 3 months | The child is asymptomatic (Please skip 3.1.2) | 0 □ |
| Mild symptoms | 1 □ |
| Moderate symptoms | 2 □ |
| Severe Symptoms (Please skip3.1.2) | 4 □ |
| 3.1.2 | Difficulty of disease-related symptoms control in the past 3 months | Symptoms are easy to control | 0 □ |
| Symptoms are controllable | 1 □ |
| Symptoms are difficult to control | 2 □ |
| 3.2 | Psychological distress of the child related to symptoms | Nonexistent | 0 □ |
| Mild | 1 □ |
| Moderate | 2 □ |
| Significant | 4 □ |
| 3.3 | Psychological distress of the parent(s) or the whole family related to the child's symptoms and suffering | Nonexistent | 0 □ |
| Mild | 1 □ |
| Moderate | 2 □ |
| Significant | 4 □ |
| **Domain 4** | **Preferences or needs of the child, parent (s), or healthcare professionals** | | |
| 4.1 | The child/parents wish to receive palliative care or have their needs met through palliative care | No (Please skip 4.2)es | 0 □ |
| Yes | 4 □ |
|  |  |
| 4.2 | You/Your team believe(s) the child would benefit from palliative care | No | 0 □ |
| Yes | 4 □ |
| **Domain 5** | **Estimated life expectancy** | | |
| 5.1 | Estimated life expectancy/Prognosis | Several years | 0 □ |
| 1 - 2years | 1 □ |
| 3 months to 1 year (Please skip 5.2) | 3 □ |
| Less than 3 months (Please skip 5.2) | 4 □ |
| 5.2 | Do you think the child will die within 6 months? | Yes | 0 □ |
| No | 2 □ |
| **Total Score** | | | |

| **Score** | **Outcome during treatment period** | **Outcome after re-evaluation** |
| --- | --- | --- |
| ≤14 | Explain the purpose of palliative care | Palliative care may be discontinued or the patient discharged |
| ≥15 | Initiate palliative care | Continue palliative care |
| ≥25 | Immediate need to initiate palliative care | Continue palliative care |
